# Supplementary material
Source: PubMed Central journal article supplement (PMC3753852)
Supplement: MCB.00057-13_zmb999100092so8.pdf [file MCB.00057-13_zmb999100092so8.pdf]

## **SUPPLEMENTAL MATERIALS**

### **SUPPLEMENTAL VIDEO LEGENDS**

#### **Video S1. Live-cell imaging of control HeLa cells.**

HeLa cells expressing histone H2B-GFP were transfected with control vector. A plasmid expressing mRFP was co-transfected to allow the identification of transfected cells.

Channels for bright field (left), histone H2B-GFP (center) and mRFP (right) are shown. The representative video was captured at 5 min/frame.

#### **Video S2. Live-cell imaging of PTTG1-expressing cells.**

HeLa cells expressing histone H2B-GFP were transfected with a plasmid expressing PTTG1. A plasmid expressing mRFP was co-transfected to allow the identification of transfected cells. Channels for bright field (left), histone H2B-GFP (center) and mRFP (right) are shown. The representative video was captured at 5 min/frame.

#### **Video S3. Degradation of APC/C biosensor in control cells.**

HeLa cells expressing histone H2B-GFP and mRFP-APC/C biosensor were transfected with control vector. A plasmid expressing YFP was co-transfected to allow the identification of transfected cells. The representative video was captured with 7 min/frame. Channels for bright field (left), histone H2B-GFP/YFP (center), and mRFP-APC/C biosensor (right) are shown.

**Video S4. Mitotic exit in ESP1-expressing cells.**

HeLa cells expressing histone H2B-GFP and mRFP-APC/C biosensor were transfected with a plasmid expressing ESP1. A plasmid expressing YFP was co-transfected to allow the identification of transfected cells. The representative video was captured with 7 min/frame. Channels for bright field (left), histone H2B-GFP/YFP (center), and mRFP-APC/C biosensor (right) are shown.

**Video S5. Mitotic exit in PTTG1<sup>H134R</sup>-expressing cells.**

HeLa cells expressing histone H2B-GFP and mRFP-APC/C biosensor were transfected with a plasmid expressing PTTG1<sup>H134R</sup>. A plasmid expressing YFP was co-transfected to allow the identification of transfected cells. The representative video was captured with 7 min/frame. Channels for bright field (left), histone H2B-GFP/YFP (center), and mRFP-APC/C biosensor (right) are shown.

**Video S6. Mitotic exit in PTTG1<sup>DA</sup>-expressing cells.**

HeLa cells expressing histone H2B-GFP and mRFP-APC/C biosensor were transfected with a plasmid expressing PTTG1<sup>DA</sup>. A plasmid expressing YFP was co-transfected to allow the identification of transfected cells. The representative video was captured with 7 min/frame. Channels for bright field (left), histone H2B-GFP/YFP (center), and mRFP-APC/C biosensor (right) are shown.

**Video S7. Mitotic exit in PTTG2<sup>R134H+DΔ</sup>-expressing cells.**

HeLa cells expressing histone H2B-GFP and mRFP-APC/C biosensor were transfected with a plasmid expressing PTTG1<sup>R134H+DΔ</sup>. A plasmid expressing YFP was co-transfected to allow the identification of transfected cells. The representative video was captured with 7 min/frame. Channels for bright field (left), histone H2B-GFP/YFP (center), and mRFP-APC/C biosensor (right) are shown.
